# Supplementary material for: Effect of Sows Gestational Methionine/Lysine Ratio on Maternal and Placental Hydrogen Sulfide Production
Source: PubMed Central journal article supplement (PMC7070849; doi:10.3390/ani10020251), 2020-02-05
Supplement: animals-10-00251-s001.pdf [file animals-10-00251-s001.pdf]

# Supplementary Files: Effect of Sows Gestational Methionine/Lysine Ratio on Maternal and Placental Hydrogen Sulfide Production

Jie Peng <sup>1,2,†</sup>, Mao Xia <sup>2,†</sup>, Jia Xiong <sup>2</sup>, Chenbin Cui <sup>2</sup>, Ningning Huang <sup>2</sup>, Yuanfei Zhou <sup>2</sup>, Hongkui Wei <sup>2</sup> and Jian Peng <sup>2,3,\*</sup>

**Table S1.** Ingredients and nutrient compositions of the experimental diets.

| Item                                  | Met/Lys=0.27 | Met/Lys=0.32 | Met/Lys=0.37 | Met/Lys=0.42 | Met/Lys=0.47 |
|---------------------------------------|--------------|--------------|--------------|--------------|--------------|
| Feedstuff%                            |              |              |              |              |              |
| Corn                                  | 10.00        | 10.00        | 10.00        | 10.00        | 10.00        |
| Sorghum                               | 24.54        | 24.54        | 24.54        | 24.54        | 24.54        |
| Barley                                | 37.89        | 37.89        | 37.89        | 37.89        | 37.89        |
| Soybeanhulls                          | 2.00         | 2.00         | 2.00         | 2.00         | 2.00         |
| Ricebran                              | 7.50         | 7.50         | 7.50         | 7.50         | 7.50         |
| Soybeanmeal                           | 9.35         | 9.35         | 9.35         | 9.35         | 9.35         |
| Palmmeal                              | 5.00         | 5.00         | 5.00         | 5.00         | 5.00         |
| 98%Lysine                             | 0.28         | 0.28         | 0.28         | 0.28         | 0.28         |
| DL-methionine                         | 0.00         | 0.04         | 0.07         | 0.11         | 0.14         |
| L-threonine                           | 0.10         | 0.10         | 0.10         | 0.10         | 0.10         |
| Limestone                             | 1.44         | 1.43         | 1.42         | 1.42         | 1.40         |
| Calciumphosphate (monocalcium)        | 0.89         | 0.88         | 0.87         | 0.84         | 0.83         |
| Sodiumchloride                        | 0.47         | 0.46         | 0.44         | 0.44         | 0.43         |
| Cholinechloride                       | 0.14         | 0.14         | 0.14         | 0.14         | 0.14         |
| Premix <sup>1</sup>                   | 0.40         | 0.40         | 0.40         | 0.40         | 0.40         |
| Total%                                | 100.00       | 100.00       | 100.00       | 100.00       | 100.00       |
| Composition (calculated) <sup>1</sup> |              |              |              |              |              |
| NEkcal/kg                             | 2317.25      | 2318.70      | 2320.15      | 2321.60      | 2323.04      |
| CP%                                   | 13.92        | 13.94        | 13.96        | 13.98        | 14.00        |
| SIDLys%                               | 0.71         | 0.71         | 0.71         | 0.71         | 0.71         |
| SIDMet%                               | 0.19         | 0.23         | 0.26         | 0.30         | 0.33         |
| SIDThr%                               | 0.48         | 0.48         | 0.48         | 0.48         | 0.48         |
| SIDTrp%                               | 0.14         | 0.14         | 0.14         | 0.14         | 0.14         |
| Met/Lys                               | 0.27         | 0.32         | 0.37         | 0.42         | 0.47         |
| CF%                                   | 3.57         | 3.57         | 3.57         | 3.57         | 3.57         |
| NDF%                                  | 14.53        | 14.53        | 14.53        | 14.53        | 14.53        |
| ADF%                                  | 7.78         | 7.78         | 7.78         | 7.78         | 7.78         |
| Starch%                               | 44.74        | 44.74        | 44.74        | 44.74        | 44.74        |
| Ash%                                  | 6.03         | 5.99         | 5.96         | 5.92         | 5.89         |
| Ca%                                   | 1.22         | 1.21         | 1.21         | 1.20         | 1.20         |
| P%                                    | 1.05         | 1.05         | 1.04         | 1.04         | 1.03         |

<sup>1</sup>Calculated chemical concentrations using values for feed ingredients from NRC (2012) [1].

## References

1. National Research Council. *Nutrient Requirements of Swine*, 11<sup>th</sup> Edition; The National Academies Press and the Transportation Research Board: Washington, D.C., USA, 2012, pp. 44.
